# Supplementary material for: Glycemic effects following the consumption of mixed soy protein isolate and alginate beverages in healthy adults
Source: Royal Society of Chemistry journal article supplement (doi:10.1039/c8fo01627e), 2019-01-01
Supplement: c8fo01627e1.pdf [file c8fo01627e1.pdf]

Randomization Scheme as generated using the Research Randomizer program  
([www.randomizer.org](http://www.randomizer.org))

| Testing Assignment |                    |
|--------------------|--------------------|
|                    | Beverage Treatment |
| Subject 01         | D                  |
|                    | E                  |
|                    | C                  |
|                    | F                  |
|                    | B                  |
|                    | A                  |
| Subject 02         | A                  |
|                    | E                  |
|                    | F                  |
|                    | D                  |
|                    | B                  |
|                    | C                  |
| Subject 03         | A                  |
|                    | B                  |
|                    | E                  |
|                    | F                  |
|                    | D                  |
|                    | C                  |
| Subject 04         | B                  |
|                    | E                  |
|                    | A                  |
|                    | F                  |
|                    | D                  |
|                    | C                  |
| Subject 05         | D                  |
|                    | E                  |
|                    | A                  |
|                    | F                  |
|                    | C                  |
|                    | B                  |

|                       |   |
|-----------------------|---|
| <b>Subject<br/>06</b> | F |
|                       | C |
|                       | B |
|                       | E |
|                       | D |
|                       | A |

|                       |   |
|-----------------------|---|
| <b>Subject<br/>07</b> | E |
|                       | F |
|                       | B |
|                       | D |
|                       | A |
|                       | C |

|                       |   |
|-----------------------|---|
| <b>Subject<br/>09</b> | A |
|                       | C |
|                       | B |
|                       | D |
|                       | E |
|                       | F |

|                       |   |
|-----------------------|---|
| <b>Subject<br/>10</b> | D |
|                       | F |
|                       | B |
|                       | E |
|                       | A |
|                       | C |

|                       |   |
|-----------------------|---|
| <b>Subject<br/>11</b> | E |
|                       | A |
|                       | F |
|                       | B |
|                       | D |
|                       | C |

|                       |   |
|-----------------------|---|
| <b>Subject<br/>12</b> | A |
|                       | F |
|                       | D |
|                       | B |
|                       | E |
|                       | C |

|                       |   |
|-----------------------|---|
|                       |   |
| <b>Subject<br/>13</b> | F |
|                       | C |
|                       | A |
|                       | E |
|                       | D |
|                       | B |
